# Supplementary material for: Efficacy and Safety of Transcranial Direct Current Stimulation on Post-Stroke Dysphagia: A Systematic Review and Meta-Analysis
Source: MDPI journal article supplement (doi:10.3390/jcm11092297), 2022-04-20
Supplement: s1 [file s1]

**Table S1.** Search strategy in PubMed.

| Order | Search Items                                                                                                                 |
|-------|------------------------------------------------------------------------------------------------------------------------------|
| #1    | MeSH: "dysphagia"                                                                                                            |
| #2    | Ti/Ab: "deglutition" OR "swallowing" OR "dysphagia"                                                                          |
| #3    | #1 AND #2                                                                                                                    |
| #4    | MeSH: "stroke"                                                                                                               |
| #5    | Ti/Ab: "stroke" OR "cerebral hemorrhage" OR "cerebral infarction" OR "cerebrovascular accident" OR "brain vascular accident" |
| #6    | #4 OR #5                                                                                                                     |
| #7    | Ti/Ab: "transcranial direct current stimulation" OR "tDCS"                                                                   |
| #8    | #3 AND #6 and #7                                                                                                             |

Abbreviation: [Title/Abstract]: Ti/Ab.

**Table S2.** Search strategy in others database \*.

| Order | Search Items                                                                                                                          |
|-------|---------------------------------------------------------------------------------------------------------------------------------------|
| #1    | Ti/Ab/keywords: "deglutition" OR "swallowing" OR "dysphagia"                                                                          |
| #2    | Ti/Ab/keywords: "stroke" OR "cerebral hemorrhage" OR "cerebral infarction" OR "cerebrovascular accident" OR "brain vascular accident" |
| #3    | Ti/Ab/keywords: "transcranial direct current stimulation" OR "tDCS"                                                                   |
| #4    | #1 AND #2 and #3                                                                                                                      |

\* Cochrane Library, Web of Science, SinoMed, and VIP; Abbreviation: [Title/Abstract]: Ti/Ab.

**Table S3.** Search strategy in others database \*\*.

| Order | Search Items                                                                                                                                                       |
|-------|--------------------------------------------------------------------------------------------------------------------------------------------------------------------|
| #1    | Ti/Ab/keyword/free-text terms/ subject words: "deglutition" OR "swallowing" OR "dysphagia"                                                                         |
| #2    | Ti/Ab/keyword/free-text terms/subject words: "stroke" OR "cerebral hemorrhage" OR "cerebral infarction" OR "cerebrovascular accident" OR "brain vascular accident" |
| #3    | Ti/Ab/keyword/free-text terms/subject words: "transcranial direct current stimulation" OR "tDCS"                                                                   |
| #4    | #1 AND #2 and #3                                                                                                                                                   |

\*\*CNKI, Wan-fang database; Abbreviation: [Title/Abstract]: Ti/Ab.
